# Supplementary material
Source: publisher site journal article supplement (https://www.dovepress.com/get_supplementary_file.php?f=457422.docx)
Supplement: Supplementary file 1 [file get_supplementary_file.php]

**Table S1.** ICD Codes Used for Identifying COPD Patients in MIMIC-IV 2.2

| **icd_code** | **icd_version** | **long_title** |
| --- | --- | --- |
| 49120 | 9 | Obstructive chronic bronchitis without exacerbation |
| 49121 | 9 | Obstructive chronic bronchitis with (acute) exacerbation |
| 49122 | 9 | Obstructive chronic bronchitis with acute bronchitis |
| 496 | 9 | Chronic airway obstruction, not elsewhere classified |
| J44 | 10 | Other chronic obstructive pulmonary disease |
| J440 | 10 | Chronic obstructive pulmonary disease with (acute) lower respiratory infection |
| J441 | 10 | Chronic obstructive pulmonary disease with (acute) exacerbation |

Note: ICD, international classification of diseases; COPD, chronic obstructive pulmonary disease

**Table S2.** Univariate analysis to identify risk factors for 90-day mortality in elderly COPD patients in the ICU.

| Item | HR(95%CI) | P value |
| --- | --- | --- |
| GNRI | 0.99 (0.98,0.99) | < 0.001 |
| GNRI≤98 | 1（Ref） |  |
| GNRI＞98 | 0.57 (0.44,0.73) | < 0.001 |
| Female | 1.18 (0.91,1.51) | 0.207 |
| Age (years) | 1.02 (1.01,1.04) | 0.011 |
| MAP（mmHg） | 0.98 (0.97,0.99) | 0.004 |
| HR（/min） | 1.01 (1.01,1.02) | < 0.001 |
| RR(/min) | 1.03 (1,1.07) | 0.046 |
| SpO2（%） | 1.0028 (0.9482,1.0606) | 0.921 |
| Temperature（℃） | 0.63 (0.52,0.76) | < 0.001 |
| HB（g/dL） | 0.93 (0.88,0.99) | 0.026 |
| WBC（109/L） | 1.01 (1,1.02) | 0.017 |
| Platelet(109/L) | 0.9989 (0.9974,1.0004) | 0.151 |
| pO2（mmHg） | 0.9977 (0.9945,1.0008) | 0.15 |
| ALB（g/dL） | 0.58 (0.47,0.71) | < 0.001 |
| BUN(mg/dL) | 1.0095 (1.0052,1.0137) | < 0.001 |
| Cr(mg/dL) | 1.09 (1.02,1.16) | 0.008 |
| Myocardial infarction | 1.11 (0.85,1.45) | 0.458 |
| Congestive heart failure | 1.11 (0.86,1.42) | 0.428 |
| Sepsis | 2.54 (1.75,3.69) | < 0.001 |
| CCI | 1.13 (1.08,1.19) | < 0.001 |
| APSIII | 1.02 (1.02,1.03) | < 0.001 |
| SOFA | 1.12 (1.06,1.19) | < 0.001 |

Note: GNRI, geriatric nutritional risk index; MAP, mean arterial pressure; HR, heart rate; RR, respiratory rate; SpO2, pulse oximetry-derived oxygen saturation；HB, hemoglobin; WBC, white blood cell; ALB, albumin; BUN, blood urea nitrogen; CR, creatine; CCI, Charlson comorbidity Index; APSIII, acute physiology score III; SOFA, sequential organ failure assessment; ICU, intensive care unit.

**Table S3.** Threshold effect analysis of the relationship of GNRI with 90-day mortality.

| **GNRI** | **Adjustd Model** | |
| --- | --- | --- |
|  | HR(95%CI) | *p-value* |
| ＜101.5 | 0.972 (0.956,0.988) | < 0.001 |
| ≥101.5 | 1.017 (0.999,1.035) | 0.0616 |
| Likelihood ratio test |  | 0.004 |

Note: GNRI, geriatric nutritional risk index; HR, Hazard ratio; CI, confidence interval. Adjusted for age, gender, race, HR, MAP, SpO2, HB, BUN, CR, PLT, WBC, myocardial infarction, congestive heart failure, severe liver disease, CCI, SOFA.

**Table S4** Baseline and Clinical Characteristics of the Study Population after adding four additional covariates

| **Variables** | **Total (n = 427)** | **GNRI** | | | | ***p* value** |
| --- | --- | --- | --- | --- | --- | --- |
| **≤81(n = 63)** | **82-91(n = 75)** | **92-98(n = 61)** | **＞98(n = 228)** |
| **Demographic variables** |  |  |  |  |  |  |
| Male, n(%) | 243 (56.9) | 35 (55.6) | 44 (58.7) | 39 (63.9) | 125 (54.8) | 0.621 |
| Age(years) | 76.7 ± 7.5 | 76.6 ± 7.6 | 78.4 ± 8.0 | 77.6 ± 7.7 | 75.9 ± 7.1 | 0.049 |
| Ethnicity, n (%) |  |  |  |  |  | 0.581 |
| Non-White | 154 (36.1) | 21 (33.3) | 25 (33.3) | 19 (31.1) | 89 (39) |  |
| White | 273 (63.9) | 42 (66.7) | 50 (66.7) | 42 (68.9) | 139 (61) |  |
| **Vital signs** |  |  |  |  |  |  |
| Temperature（℃） | 36.9 ± 0.5 | 36.8 ± 0.6 | 36.8 ± 0.5 | 36.7 ± 0.5 | 36.9 ± 0.4 | 0.013 |
| HR（/min） | 86.2 ± 16.9 | 89.4 ± 17.8 | 88.5 ± 15.7 | 87.4 ± 17.5 | 84.2 ± 16.8 | 0.066 |
| RR(/min) | 20.5 ± 3.8 | 20.9 ± 5.2 | 20.6 ± 4.2 | 20.0 ± 2.7 | 20.6 ± 3.5 | 0.616 |
| MAP(mmHg) | 75.9 ± 9.0 | 74.5 ± 7.1 | 74.5 ± 10.1 | 77.7 ± 10.5 | 76.3 ± 8.6 | 0.098 |
| Spo2（%） | 96.2 ± 2.6 | 96.4 ± 3.9 | 96.3 ± 2.8 | 96.0 ± 2.7 | 96.2 ± 2.0 | 0.81 |
| **Laboratory events** |  |  |  |  |  |  |
| WBC(10^9/L) | 13.8 (10.1, 19.4) | 15.0 (11.4, 20.7) | 14.2 (9.6, 19.9) | 12.6 (9.5, 17.7) | 13.8 (10.4, 18.5) | 0.152 |
| Platelet(10^9/L) | 218.0 (152.5, 285.0) | 222.0 (150.0, 321.5) | 224.0 (154.0, 343.5) | 210.0 (149.0, 298.0) | 211.5 (155.0, 261.8) | 0.249 |
| ALB(g/dL) | 3.1 ± 0.6 | 2.2 ± 0.5 | 2.9 ± 0.4 | 3.1 ± 0.4 | 3.4 ± 0.5 | < 0.001 |
| BUN(mg/dL) | 30.0 (20.0, 49.5) | 31.0 (17.5, 46.0) | 28.0 (17.0, 45.5) | 26.0 (20.0, 49.0) | 32.5 (21.8, 54.2) | 0.222 |
| CR(mg/dL) | 1.3 (0.9, 2.2) | 1.1 (0.8, 2.0) | 1.3 (0.9, 2.0) | 1.2 (0.9, 2.1) | 1.4 (1.0, 2.3) | 0.034 |
| pH | 7.3 ± 0.1 | 7.3 ± 0.1 | 7.3 ± 0.1 | 7.3 ± 0.1 | 7.3 ± 0.1 | 0.276 |
| PO2(mmHg) | 70.0 (54.0, 93.0) | 72.0 (56.0, 91.0) | 71.0 (55.0, 96.5) | 69.0 (50.0, 87.0) | 69.5 (54.0, 93.2) | 0.765 |
| pCO2(mmHg) | 51.0 (43.0, 61.0) | 52.0 (43.0, 61.0) | 52.0 (42.5, 60.0) | 47.0 (38.0, 57.0) | 52.0 (44.0, 63.0) | 0.282 |
| Lactate（mmol/L） | 1.8 (1.2, 3.3) | 2.1 (1.4, 3.7) | 1.6 (1.2, 3.3) | 1.7 (1.2, 2.4) | 1.8 (1.3, 3.2) | 0.154 |
| **Comorbidities, n(%)** |  |  |  |  |  |  |
| Myocardial infarction | 139 (32.6) | 14 (22.2) | 29 (38.7) | 19 (31.1) | 77 (33.8) | 0.208 |
| Severe liver disease | 10 ( 2.3) | 2 (3.2) | 1 (1.3) | 2 (3.3) | 5 (2.2) | 0.814 |
| Diabetes with complication | 69 (16.2) | 5 (7.9) | 8 (10.7) | 9 (14.8) | 47 (20.6) | 0.041 |
| Sepsis | 328 (76.8) | 54 (85.7) | 61 (81.3) | 45 (73.8) | 168 (73.7) | 0.155 |
| **Severity of disease** |  |  |  |  |  |  |
| AECOPD, n (%) | 171 (40.0) | 24 (38.1) | 29 (38.7) | 22 (36.1) | 96 (42.1) | 0.81 |
| Respiratory failure, n (%) | 275 (64.4) | 42 (66.7) | 50 (66.7) | 38 (62.3) | 145 (63.6) | 0.921 |
| Vasopressin treatment, n (%) | 350 (82.0) | 44 (69.8) | 61 (81.3) | 53 (86.9) | 192 (84.2) | 0.045 |
| Ventilation status, n (%) |  |  |  |  |  | 0.321 |
| Without oxygen | 21 ( 4.9) | 4 (6.3) | 4 (5.3) | 4 (6.6) | 9 (3.9) |  |
| Noninvasive | 27 ( 6.3) | 1 (1.6) | 4 (5.3) | 6 (9.8) | 16 (7) |  |
| Invasive | 248 (58.1) | 45 (71.4) | 42 (56) | 32 (52.5) | 129 (56.6) |  |
| Highflow | 40 ( 9.4) | 6 (9.5) | 10 (13.3) | 5 (8.2) | 19 (8.3) |  |
| Oxygen | 91 (21.3) | 7 (11.1) | 15 (20) | 14 (23) | 55 (24.1) |  |
| CCI | 8.0 ± 2.3 | 7.9 ± 2.7 | 7.9 ± 2.0 | 8.5 ± 2.8 | 8.0 ± 2.2 | 0.329 |
| APSIII | 56.0 (42.0, 75.0) | 71.0 (54.0, 87.0) | 58.0 (44.0, 69.0) | 56.0 (41.0, 74.0) | 53.0 (41.0, 73.0) | < 0.001 |
| OASIS | 38.6 ± 9.1 | 42.7 ± 9.4 | 39.3 ± 8.5 | 38.6 ± 9.5 | 37.3 ± 8.9 | < 0.001 |
| SOFA | 3.0 (2.0, 4.0) | 4.0 (2.0, 5.0) | 4.0 (3.0, 5.0) | 3.0 (2.0, 4.0) | 3.0 (2.0, 4.0) | 0.058 |
| **Clinical outcome** |  |  |  |  |  |  |
| Hospital LOS(d) | 9.8 (5.8, 16.9) | 12.9 (4.9, 20.0) | 10.2 (6.0, 15.8) | 9.5 (5.6, 16.0) | 9.8 (6.1, 16.6) | 0.871 |
| ICU LOS(d) | 4.1 (2.3, 8.0) | 3.8 (2.5, 6.4) | 4.9 (2.2, 7.6) | 4.1 (2.0, 7.7) | 4.0 (2.5, 8.2) | 0.907 |
| 30-day mortality, n (%) | 128 (30.0) | 33 (52.4) | 26 (34.7) | 19 (31.1) | 50 (21.9) | < 0.001 |
| 60-day mortality, n (%) | 146 (34.2) | 37 (58.7) | 28 (37.3) | 24 (39.3) | 57 (25) | < 0.001 |
| 90-day mortality, n (%) | 159 (37.2) | 40 (63.5) | 29 (38.7) | 26 (42.6) | 64 (28.1) | < 0.001 |

Note: GNRI, geriatric nutritional risk index; HR, heart rate; RR, respiratory rate; MAP, mean arterial pressure; SpO2, pulse oximetry-derived oxygen saturation；WBC, white blood cell; ALB, albumin; BUN, blood urea nitrogen; CR, creatine; pO2, partial pressure of oxygen; pCO2, partial pressure of carbon dioxide; AECOPD, acute exacerbation of chronic obstructive pulmonary disease; CCI, Charlson comorbidity Index; APSIII, acute physiology score III; OASIS, oxford acute severity of illness score; SOFA, sequential organ failure assessment; LOS, length of stay; ICU, intensive critical care.

**Table S5.** Baseline characteristics between survivors and non-survivors after adding four additional covariates

| **Variables** | **Total** | **Survival** | **Non-survival** | ***p* value** |
| --- | --- | --- | --- | --- |
| **(n = 427)** | **(n = 268)** | **(n = 159)** |
| **Demographic variables** |  |  |  |  |
| Male, n(%) | 243 (56.9) | 160 (59.7) | 83 (52.2) | 0.13 |
| Age(years) | 76.7 ± 7.5 | 76.1 ± 7.3 | 77.6 ± 7.7 | 0.04 |
| Ethnicity, n (%) |  |  |  | 0.11 |
| Non-White | 154 (36.1) | 89 (33.2) | 65 (40.9) |  |
| White | 273 (63.9) | 179 (66.8) | 94 (59.1) |  |
| **Vital signs** |  |  |  |  |
| Temperature（℃） | 36.9 ± 0.5 | 36.9 ± 0.4 | 36.8 ± 0.6 | 0.002 |
| HR（/min） | 86.2 ± 16.9 | 84.4 ± 15.8 | 89.2 ± 18.3 | 0.005 |
| RR(/min) | 20.5 ± 3.8 | 20.3 ± 3.7 | 20.9 ± 4.1 | 0.119 |
| MAP(mmHg) | 75.9 ± 9.0 | 76.7 ± 9.0 | 74.5 ± 8.9 | 0.016 |
| Spo2（%） | 96.2 ± 2.6 | 96.2 ± 2.2 | 96.1 ± 3.2 | 0.544 |
| **Laboratory events** |  |  |  |  |
| WBC(10^9/L) | 13.8 (10.1, 19.4) | 13.6 (10.2, 18.8) | 14.7 (10.4, 20.3) | 0.161 |
| Platelet(10^9/L) | 218.0 (152.5, 285.0) | 219.0 (157.8, 277.5) | 208.0 (136.0, 291.5) | 0.258 |
| ALB(g/dL) | 3.1 ± 0.6 | 3.2 ± 0.6 | 2.9 ± 0.7 | < 0.001 |
| BUN(mg/dL) | 30.0 (20.0, 49.5) | 27.0 (17.8, 44.0) | 40.0 (24.0, 61.0) | < 0.001 |
| CR(mg/dL) | 1.3 (0.9, 2.2) | 1.3 (0.9, 1.8) | 1.6 (1.0, 2.6) | 0.001 |
| pH | 7.3 ± 0.1 | 7.3 ± 0.1 | 7.3 ± 0.1 | 0.006 |
| PO2(mmHg) | 70.0 (54.0, 93.0) | 69.0 (54.0, 94.0) | 72.0 (53.5, 87.0) | 0.579 |
| pCO2(mmHg) | 51.0 (43.0, 61.0) | 51.0 (43.0, 63.0) | 51.0 (43.0, 61.0) | 0.763 |
| Lactate（mmol/L） | 1.8 (1.2, 3.3) | 1.7 (1.2, 3.2) | 1.8 (1.2, 3.4) | 0.421 |
| **Comorbidities, n(%)** |  |  |  |  |
| Myocardial infarction | 139 (32.6) | 88 (32.8) | 51 (32.1) | 0.871 |
| Severe liver disease | 10 ( 2.3) | 4 (1.5) | 6 (3.8) | 0.185 |
| Diabetes with complication | 69 (16.2) | 45 (16.8) | 24 (15.1) | 0.645 |
| Sepsis | 328 (76.8) | 187 (69.8) | 141 (88.7) | < 0.001 |
| **Severity of disease** |  |  |  |  |
| AECOPD, n (%) | 171 (40.0) | 106 (39.6) | 65 (40.9) | 0.787 |
| Reapiratory failure, n (%) | 275 (64.4) | 169 (63.1) | 106 (66.7) | 0.452 |
| Vasopressin treatment, n (%) | 350 (82.0) | 242 (90.3) | 108 (67.9) | < 0.001 |
| Ventilation status, n (%) |  |  |  | 0.007 |
| Without oxygen | 21 ( 4.9) | 18 (6.7) | 3 (1.9) |  |
| Noninvasive | 27 ( 6.3) | 17 (6.3) | 10 (6.3) |  |
| Invasive | 248 (58.1) | 139 (51.9) | 109 (68.6) |  |
| Highflow | 40 ( 9.4) | 28 (10.4) | 12 (7.5) |  |
| Oxygen | 91 (21.3) | 66 (24.6) | 25 (15.7) |  |
| CCI | 8.0 ± 2.3 | 7.7 ± 2.2 | 8.6 ± 2.4 | < 0.001 |
| APSIII | 56.0 (42.0, 75.0) | 50.5 (38.0, 66.2) | 69.0 (54.0, 89.0) | < 0.001 |
| SAPSII | 45.8 ± 13.2 | 42.4 ± 11.6 | 51.6 ± 13.8 | < 0.001 |
| OASIS | 38.6 ± 9.1 | 36.8 ± 8.6 | 41.8 ± 9.2 | < 0.001 |
| SOFA | 3.0 (2.0, 4.0) | 3.0 (2.0, 4.0) | 4.0 (3.0, 5.0) | < 0.001 |
| **Clinical outcome** |  |  |  |  |
| Hospital LOS(d) | 9.8 (5.8, 16.9) | 9.8 (6.6, 16.9) | 10.1 (4.2, 16.8) | 0.029 |
| ICU LOS(d) | 4.1 (2.3, 8.0) | 3.8 (2.1, 7.0) | 4.9 (2.7, 9.0) | 0.033 |

Note: GNRI, geriatric nutritional risk index; HR, heart rate; RR, respiratory rate; MAP, mean arterial pressure; SpO2, pulse oximetry-derived oxygen saturation；WBC, white blood cell; ALB, albumin; BUN, blood urea nitrogen; CR, creatine; pO2, partial pressure of oxygen; pCO2, partial pressure of carbon dioxide; AECOPD, acute exacerbation of chronic obstructive pulmonary disease; CCI, Charlson comorbidity Index; APSIII, acute physiology score III; OASIS, oxford acute severity of illness score; SOFA, sequential organ failure assessment; LOS, length of stay; ICU, intensive critical care.

**Table S6.** Multivariable Cox regression analysis after adjusting severity of respiratory failure

| **Variable** | **Unadjusted** | |  | **Model 1** | |  | **Model 2** | |  | **Model 3** | |
| --- | --- | --- | --- | --- | --- | --- | --- | --- | --- | --- | --- |
|  | **HR 95% CI** | **P-value** |  | **HR 95% CI** | **P-value** |  | **HR 95% CI** | **P-value** |  | **HR 95% CI** | **P-value** |
| GNRIa | 0.982 (0.974~0.990) | < 0.001 |  | 0.983 (0.974~0.991) | <0.001 |  | 0.982 (0.973~0.991) | <0.001 |  | 0.979 (0.97~0.988) | <0.001 |
| **GNRI (vs. Q4)** |  | |  |  |  |  |  |  |  |  |  |
| Q4(＞98) | Ref. |  |  | Ref. |  |  | Ref. |  |  | Ref. |  |
| Q3(92-98) | 1.68 (1.07~2.66) | 0.025 |  | 1.68(1.06~2.66) | 0.027 |  | 1.93 (1.21~3.07) | 0.006 |  | 1.95(1.21~3.16) | 0.007 |
| Q2(82-91) | 1.55(1.00~2.40) | 0.051 |  | 1.49 (0.95~2.32) | 0.080 |  | 1.51 (0.96~2.38) | 0.078 |  | 1.55 (0.97~2.48) | 0.065 |
| Q1(≤81) | 3.10 (2.09~4.61) | <0.001 |  | 3.02 (2.09~4.61) | <0.001 |  | 3.29 (2.18~4.96) | <0.001 |  | 3.42 (2.25~5.21) | <0.001 |
| P for trend |  | <0.001 |  |  | <0.001 |  |  | <0.001 |  |  | <0.001 |

Notes: GNRI, Geriatric Nutritional Risk Index. GNRIa was entered as a continuous variable per 1 unit.

Model 1 = Adjusted for (age + gender). gen saturation; BUN, blood urea nitrogen; Cr, creatinine; PLT, platelet; WBC, white blood cell; AECOPD, acute exacerbation of chronic obstructive pulmonary disease; CCI, Charlson comorbidity Index; SOFA, sequential organ failure assessment

Model 2 = Model1 + (race + HR + MAP + SpO2 + BUN+ Cr + PLT + WBC).

Model 3 = Model 2 + (myocardial infarction + severe liver disease + AECOPD+ Vasopressin treatment + ventilation + Reapiratory failure + CCI + SOFA).

Abbreviations: GNRI, geriatric nutritional risk index; HR, heart rate; MAP, mean arterial pressure; RR, respiratory rate; SpO2, pulse oximetry-derived oxygen saturation; BUN, blood urea nitrogen; Cr, creatinine; PLT, platelet; WBC, white blood cell; AECOPD, acute exacerbation of chronic obstructive pulmonary disease; CCI, Chalson comorbidity Index; SOFA, sequential organ failure assessment

**Fig. S1.** Flowchart of patient selection.

**
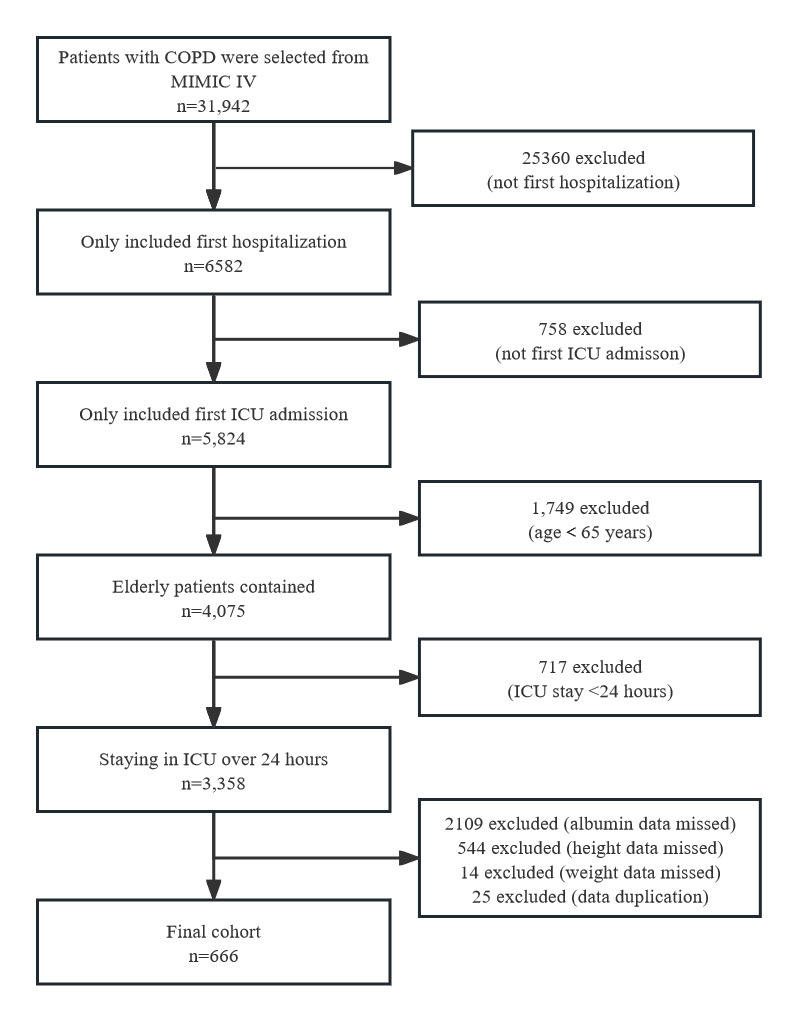
**


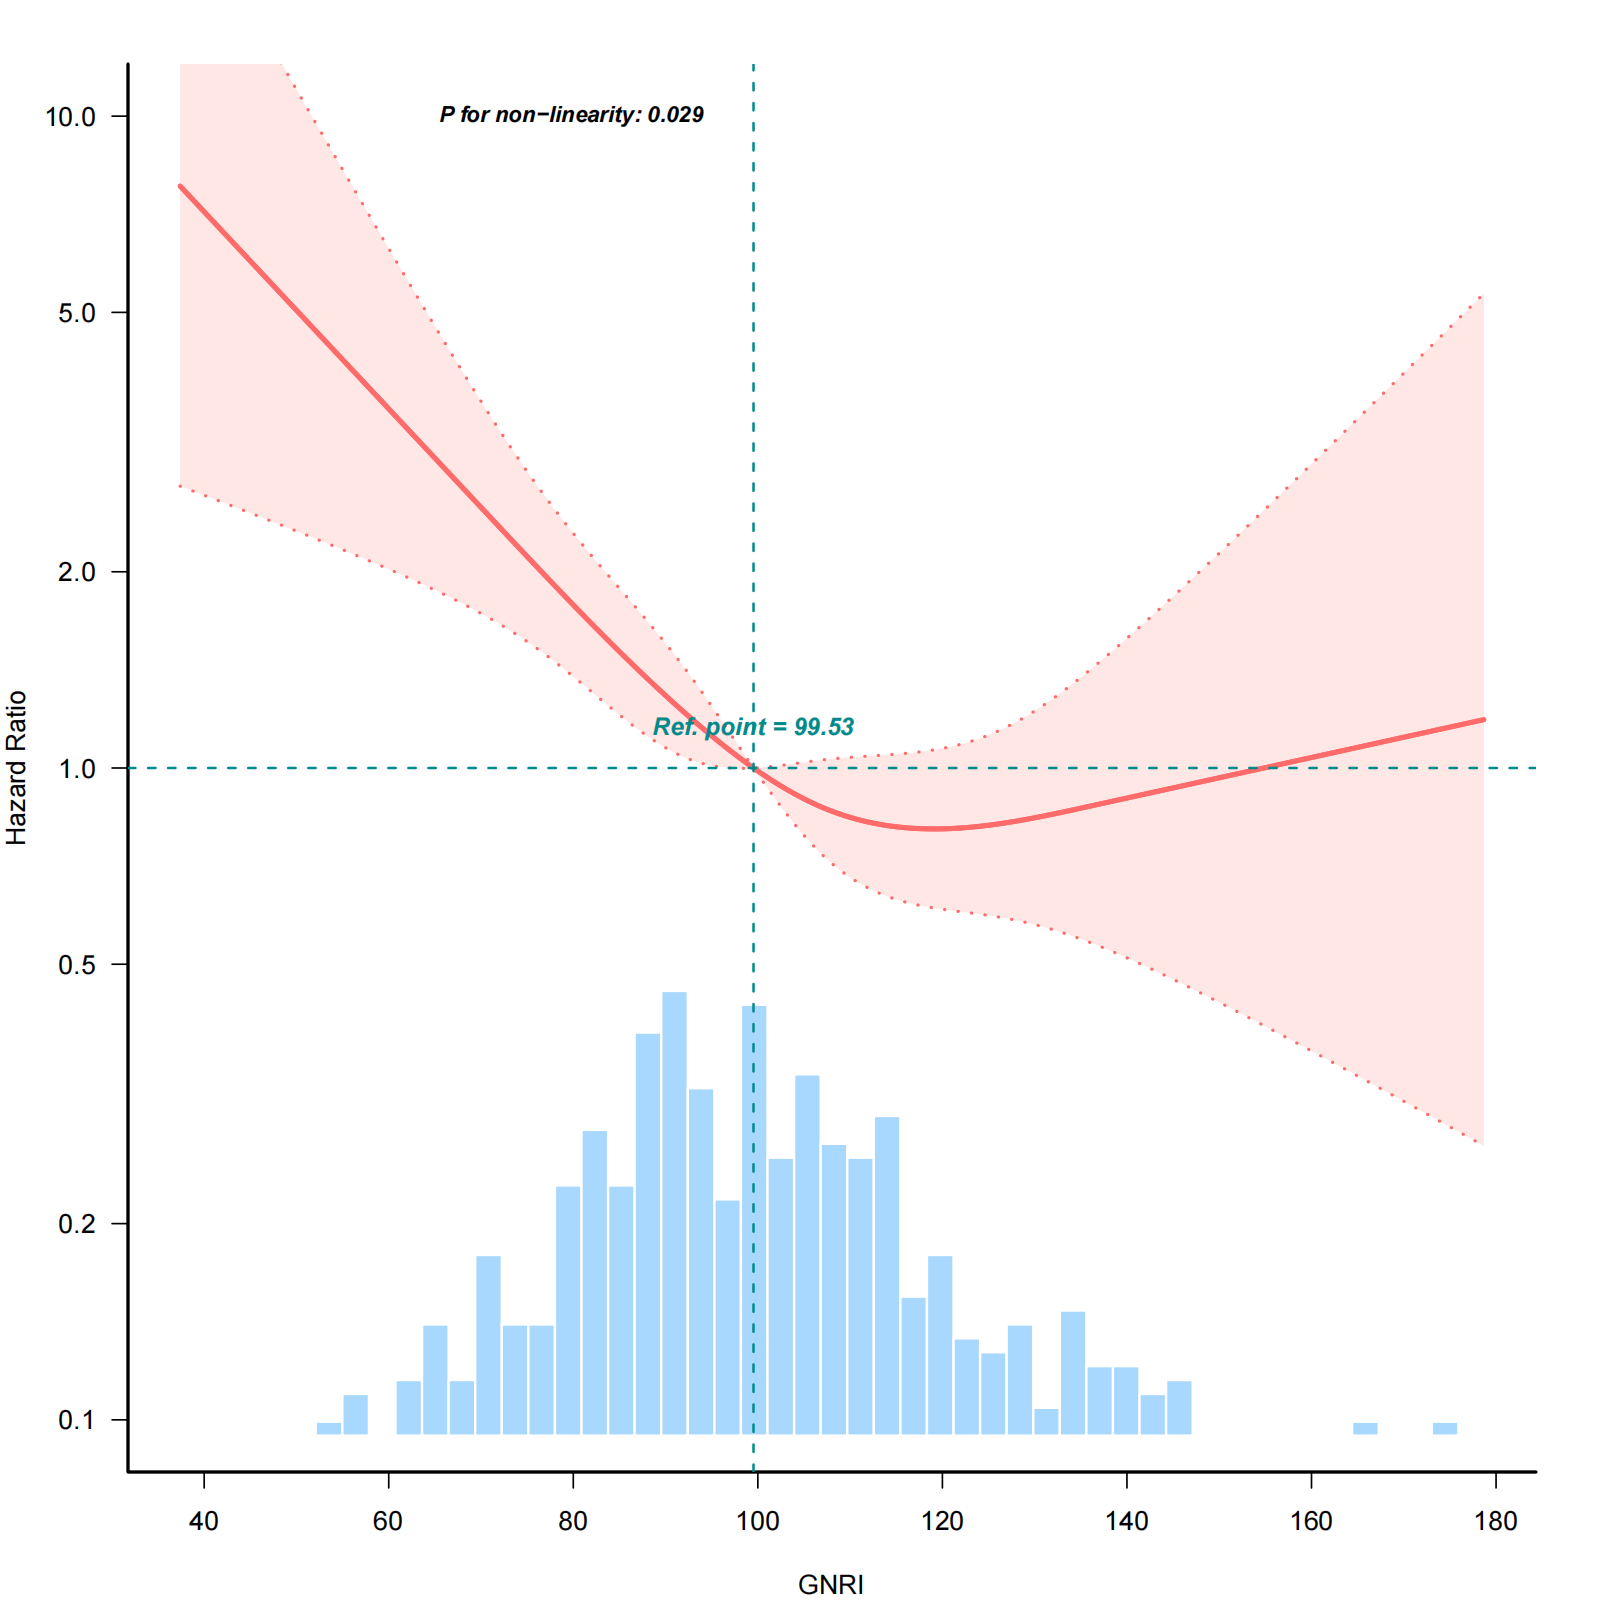


**Fig. S2.** Relationship between GNRI（X）and 90-day Mortality（Y）after adjusting severity of respiratory failure


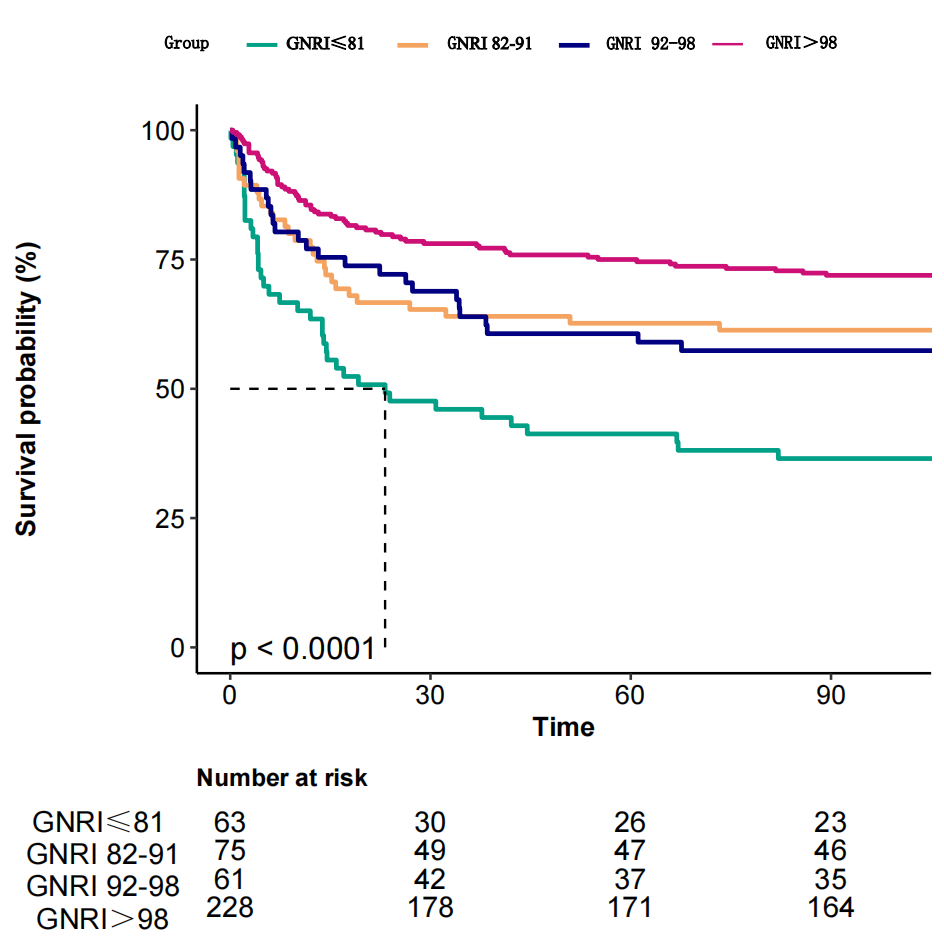


**Fig. S3.** Kaplan-Meier curves of 90-day mortality according to GNRI after adjusting severity of respiratory failure.
